# Supplementary material for: Controlling the growth of nanosized titaniaviapolymer gelation for photocatalytic applications
Source: Royal Society of Chemistry journal article supplement (doi:10.1039/d0ra03312j), 2020-01-01
Supplement: d0ra03312j1.pdf [file d0ra03312j1.pdf]

**ESI (electronic supplementary information)**

**Title:**

Controlling growth of nanosized titania *via* polymers gelation for photocatalytic application

**Authors:**

Yousra El Jemli,<sup>a,b</sup> Mohammed Mansori,<sup>a</sup> Oscar Gonzalez Diaz,<sup>b</sup> Abdellatif Barakat,<sup>c,d</sup>  
Abderrahim Solhy,<sup>d</sup> and Karima Abdelouahdi<sup>a\*</sup>

**Affiliation:**

<sup>a</sup> IMED-Lab, FST, Cadi Ayyad University, Marrakesh, Morocco.

<sup>b</sup> Grupo de Fotocatálisis y Espectroscopía para Aplicaciones Medioambientales (Grupo FEAM), Unidad Asociada al CSIC, Dpto. Química, Instituto de Estudios Ambientales y Recursos Naturales i-UNAT, Universidad de Las Palmas de Gran Canaria, Campus Universitario de Tafira, 35017 Las Palmas, Spain.

<sup>c</sup> IATE, Montpellier University, INRAE, Agro Institut, 34060 Montpellier France.

<sup>d</sup> Mohammed VI Polytechnic University, Ben Guerir, Morocco.

**Corresponding Author:**

E-mail: [abdelouahdi@gmail.com](mailto:abdelouahdi@gmail.com)

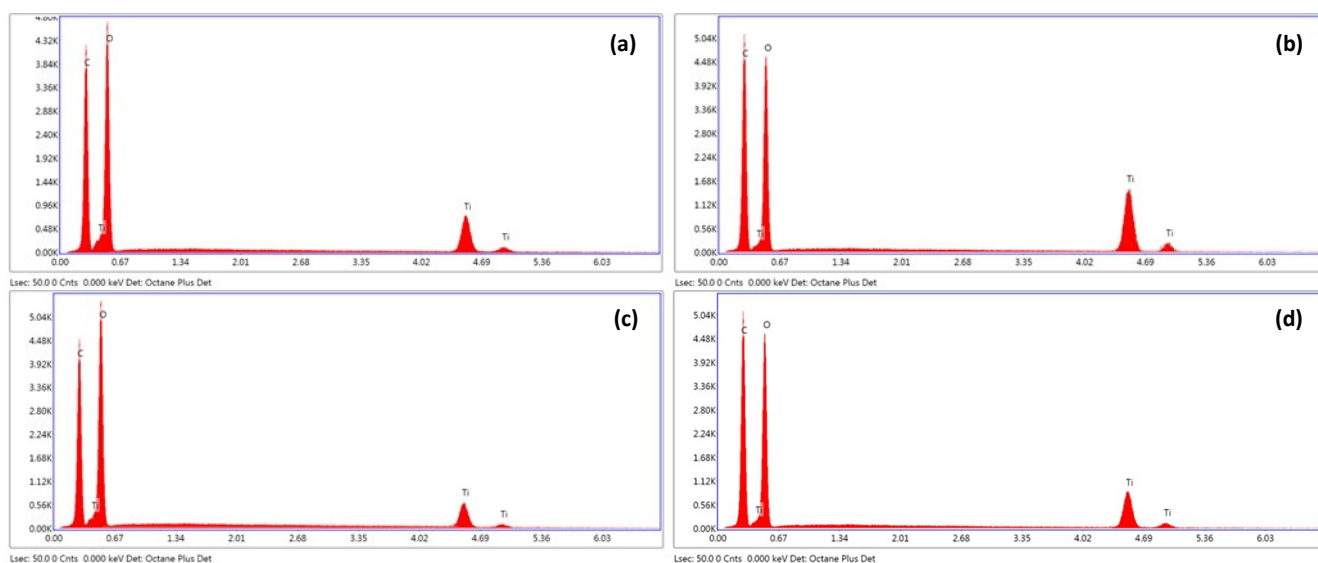

Fig. S1. EDS analysis of: (a) CMC@Ti\_X, (b) CMC@Ti\_C, (c) Alg@Ti\_X and (d) Alg@Ti\_C

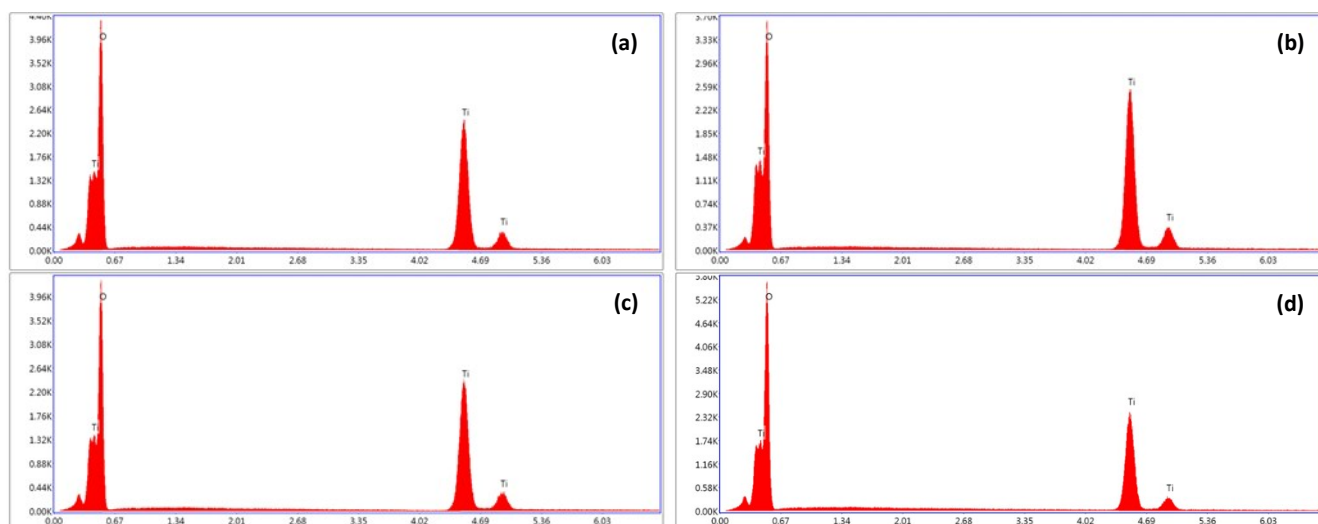

Fig. S2. EDS analysis of: (a) TiO<sub>2</sub>\_X<sub>cmc</sub>, (b) TiO<sub>2</sub>\_C<sub>cmc</sub>, (c) TiO<sub>2</sub>\_X<sub>alg</sub> and (d) TiO<sub>2</sub>\_C<sub>alg</sub>

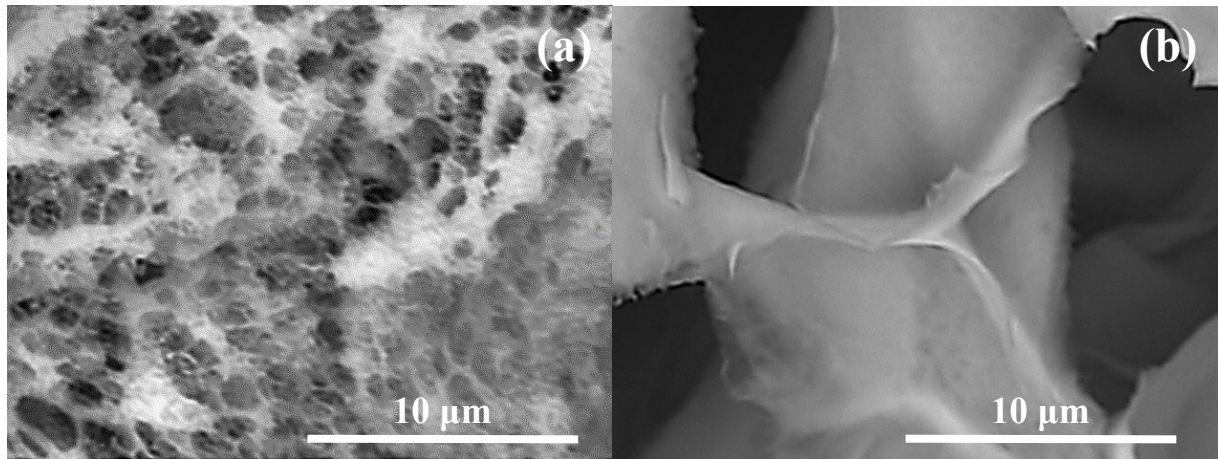

Fig. S3. Low magnification SEM images of: (a)  $\text{TiO}_2\text{-C}_{\text{cmc}}$ , and (b)  $\text{TiO}_2\text{-C}_{\text{alg}}$

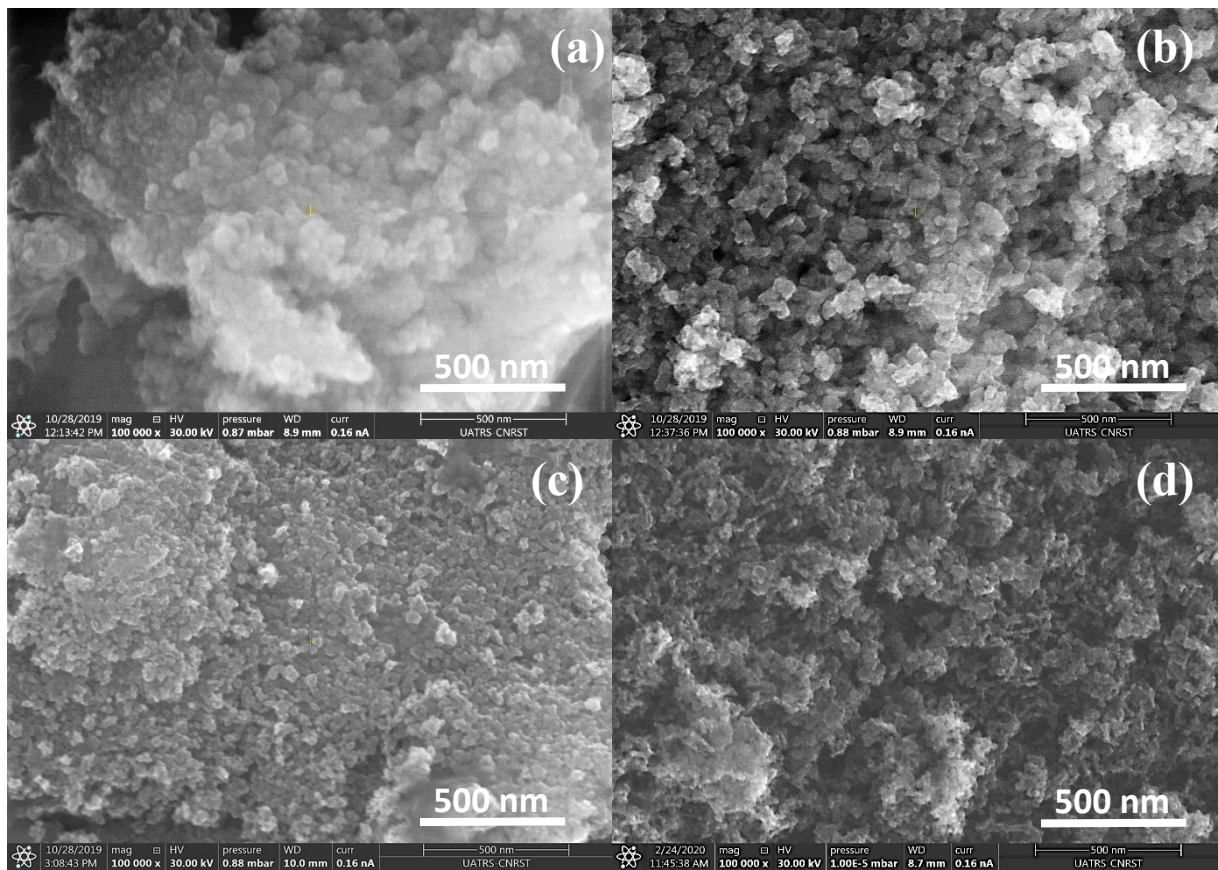

Fig. S4. SEM images of: (a)  $\text{TiO}_2\text{-X}_{\text{cmc}}$ , (b)  $\text{TiO}_2\text{-C}_{\text{cmc}}$ , (c)  $\text{TiO}_2\text{-X}_{\text{alg}}$  and (d)  $\text{TiO}_2\text{-C}_{\text{alg}}$

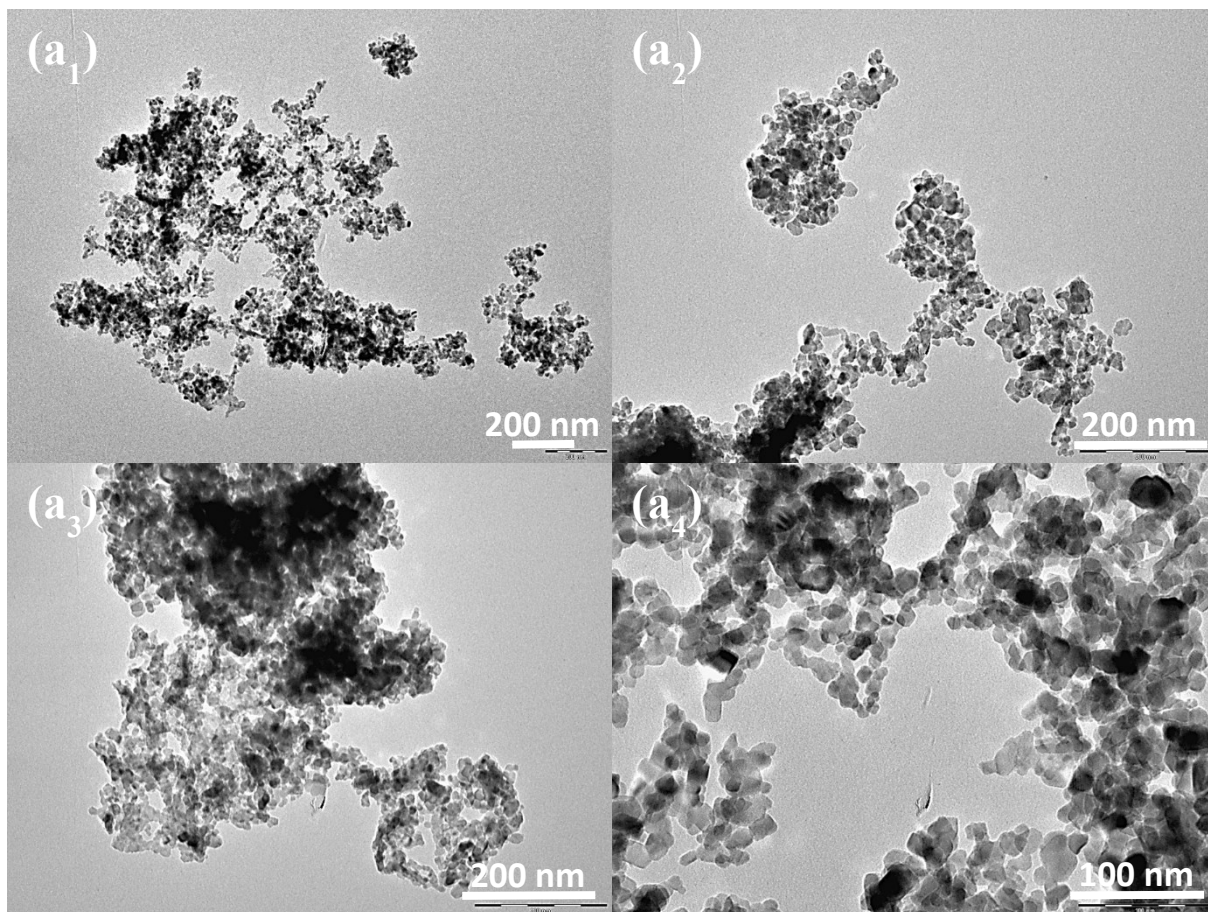

Fig. S5. TEM images of  $\text{TiO}_2\text{-C}_{\text{alg}}$  at different magnifications

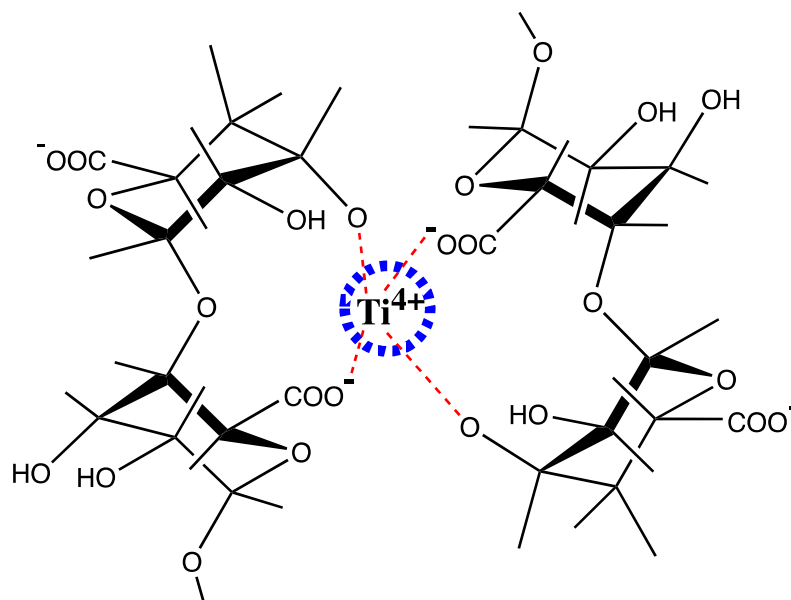

Fig. S6.  $\text{Ti}^{4+}$  cation chelation by alginate gel

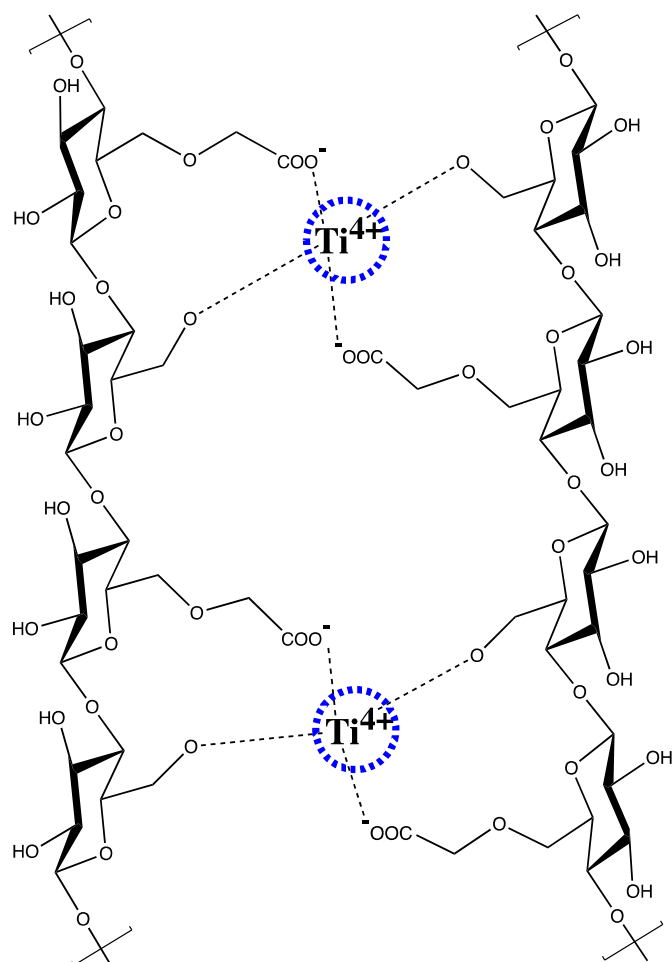

Fig. S7.  $Ti^{4+}$  cation chelation by CMC gel
